# Supplementary material for: Characterization and Comparison of the Two Mitochondrial Genomes in the Genus Rana
Source: MDPI journal article supplement (doi:10.3390/genes14091786), 2023-09-11
Supplement: s1 [file s1]

# Characterization and comparison of the mitochondrial genomes from two *Rana* species

Yan-Mei Wang, Chi-Ying Zhang, Si-Te Luo, Guo-Hua Ding, Fen Qiao

## Supplemental materials

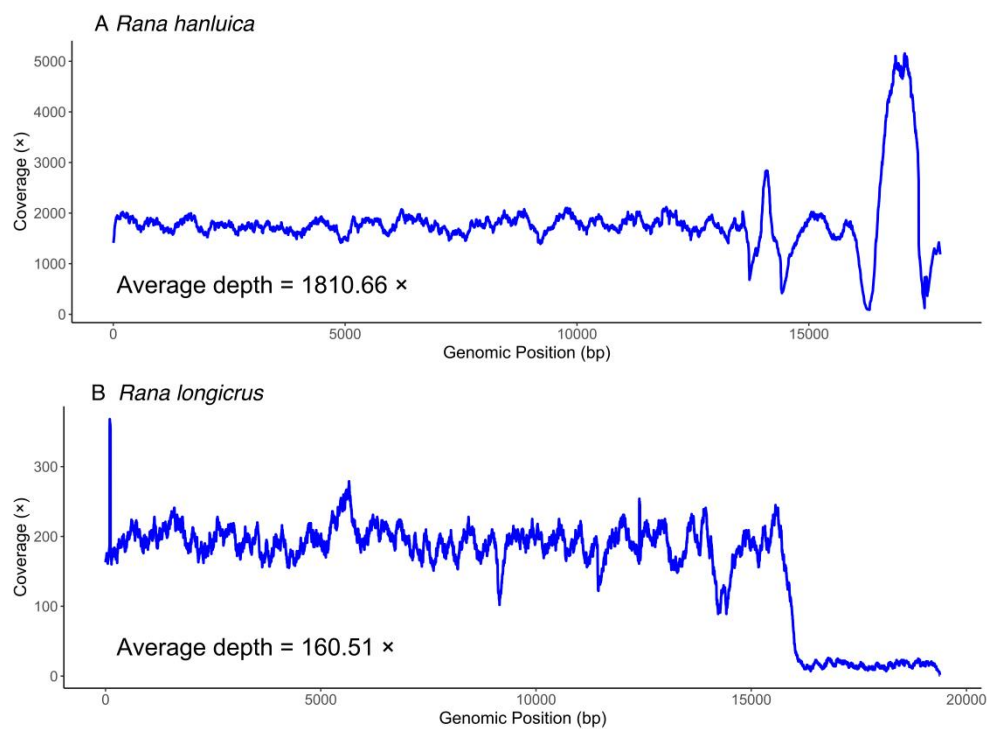

**Figure S1.** Mitogenome coverage map of (A) *Rana hanluica* and (B) *Rana longicrus*.

**Table S1** GenBank accession numbers of the ranid species used in the phylogenetic trees.

| ID | Genus           | Species                    | Accession No. | Mitogenome size (bp) | Quality  | References                  |
|----|-----------------|----------------------------|---------------|----------------------|----------|-----------------------------|
| 1  | <i>Amolops</i>  | <i>Amolops ricketti</i>    | NC_023949     | 17,772               | complete | Li et al., 2016c            |
| 2  |                 | <i>Amolops wuyiensis</i>   | NC_025591     | 17,797               | complete | Huang et al., 2016          |
| 3  | <i>Odorrana</i> | <i>Odorrana graminea</i>   | NC_050884     | 18,106               | complete | Jin et al., 2020            |
| 4  |                 | <i>Odorrana schmackeri</i> | NC_027827     | 18,302               | complete | Unpublished                 |
| 5  | <i>Rana</i>     | <i>Rana amurensis</i>      | MF370348      | 20,571               | complete | Liu et al., 2017            |
| 6  |                 | <i>Rana amurensis</i>      | NC_030042     | 18470                | complete | Unpublished                 |
| 7  |                 | <i>Rana chaochiaoensis</i> | NC_035803     | 18,591               | complete | Unpublished                 |
| 8  |                 | <i>Rana chensinensis</i>   | NC_023529     | 18,808               | complete | Li et al., 2016a            |
| 9  |                 | <i>Rana coreana</i>        | NC_024548     | 22,255               | complete | Li et al. (2016b)           |
| 10 |                 | <i>Rana dabieshanensis</i> | MW526989      | 18,291               | complete | Unpublished                 |
| 11 |                 | <i>Rana draytonii</i>      | NC_028296     | 17,805               | complete | Unpublished                 |
| 24 |                 | <i>Rana dybowskii</i>      | NC_023528     | 18,864               | complete | Li et al. (2016a)           |
| 12 |                 | <i>Rana hanluica</i>       | MZ680528      | 19,395               | complete | This study                  |
| 14 |                 | <i>Rana huanrensis</i>     | NC_028521     | 19,253               | complete | Dong et al., 2016           |
| 13 |                 | <i>Rana kukunoris</i>      | KU310893      | 15,182               | partial  | Unpublished                 |
| 15 |                 | <i>Rana kukunoris</i>      | MN733918      | 16,644               | complete | Wang et al., 2020           |
| 16 |                 | <i>Rana kukunoris</i>      | NC_035804     | 18,863               | complete | Unpublished                 |
| 17 |                 | <i>Rana longicrus</i>      | MZ680529      | 17,833               | complete | This study                  |
| 18 |                 | <i>Rana omeimontis</i>     | MK483118      | 20,120               | complete | Jiang et al., 2020          |
| 19 |                 | <i>Rana omeimontis</i>     | NC_035805     | 19,934               | complete | Unpublished                 |
| 20 |                 | <i>Rana pyrenaica</i>      | KU720300      | 17,211               | complete | Peso-Fernández et al., 2016 |
| 21 |                 | <i>Rana temporaria</i>     | NC_042226     | 16,061               | complete | Chen et al., 2018           |
| 22 |                 | <i>Rana uenoi</i>          | NC_056272     | 17,370               | complete | Suk et al., 2021            |
| 23 |                 | <i>Rana zhenhaiensis</i>   | MN218687      | 19,205               | complete | Huang et al., 2019          |

**Table S2.** The mitogenome characteristics and location of the two *Rana* species.

| Feature        | Strand | <i>R. hanluica</i> |                        |                  | <i>R. longicrus</i> |                        |                  |
|----------------|--------|--------------------|------------------------|------------------|---------------------|------------------------|------------------|
|                |        | Position           | Intergenic nucleotides | Start/Stop codon | Position            | Intergenic nucleotides | Start/Stop codon |
| trnL(tag)      | +      | 1-72               | 0                      |                  | 1-72                | 0                      |                  |
| trnT(tgt)      | +      | 75-144             | 2                      |                  | 75-144              | 2                      |                  |
| trnP(tgg)      | -      | 145-213            | 0                      |                  | 145-213             | 0                      |                  |
| trnF(gaa)      | +      | 216-285            | 2                      |                  | 215-284             | 1                      |                  |
| 12S rRNA       | +      | 286-1217           | 0                      |                  | 285-1215            | 0                      |                  |
| trnV(tac)      | +      | 1217-1285          | -1                     |                  | 1216-1284           | 0                      |                  |
| 16S rRNA       | +      | 1286-2862          | 0                      |                  | 1285-2862           | 0                      |                  |
| trnL(taa)      | +      | 2862-2934          | -1                     |                  | 2862-2934           | -1                     |                  |
| ND1            | +      | 2935-3895          | 0                      | GTG/T(AA)        | 2935-3895           | 0                      | GTG/T(AA)        |
| trnI(gat)      | +      | 3896-3966          | 0                      |                  | 3896-3966           | 0                      |                  |
| trnQ(ttg)      | -      | 3968-4038          | 1                      |                  | 3967-4037           | 0                      |                  |
| trnM(cat)      | +      | 4038-4106          | -1                     |                  | 4037-4105           | -1                     |                  |
| ND2            | +      | 4107-5141          | 0                      | ATG/TAG          | 4106-5140           | 0                      | ATG/TAG          |
| trnW(tca)      | +      | 5140-5209          | -2                     |                  | 5139-5208           | -2                     |                  |
| trnA(tgc)      | -      | 5210-5279          | 0                      |                  | 5209-5278           | 0                      |                  |
| trnN(gtt)      | -      | 5280-5352          | 0                      |                  | 5279-5351           | 0                      |                  |
| trnC(gca)      | -      | 5379-5443          | 0                      |                  | 5379-5443           | 0                      |                  |
| trnY(gta)      | -      | 5444-5510          | 0                      |                  | 5444-5510           | 0                      |                  |
| COX1           | +      | 5512-7065          | 1                      | GTG/AGG          | 5512-7065           | 1                      | GTG/AGG          |
| trnS(tga)      | -      | 7057-7127          | -9                     |                  | 7057-7127           | -9                     |                  |
| trnD(gtc)      | +      | 7129-7197          | 1                      |                  | 7129-7197           | 1                      |                  |
| COX2           | +      | 7198-7885          | 0                      | ATG/T(AA)        | 7198-7885           | 0                      | ATG/T(AA)        |
| trnK(ttt)      | +      | 7886-7954          | 0                      |                  | 7886-7954           | 0                      |                  |
| ATP8           | +      | 7956-8117          | 1                      | ATG/TAA          | 7956-8117           | 1                      | ATG/TAA          |
| ATP6           | +      | 8111-8793          | -7                     | ATG/TA(A)        | 8111-8793           | -7                     | ATG/TA(A)        |
| COX3           | +      | 8793-9577          | -1                     | ATG/TA(A)        | 8793-9577           | -1                     | ATG/TA(A)        |
| trnG(tcc)      | +      | 9577-9644          | -1                     |                  | 9577-9644           | -1                     |                  |
| ND3            | +      | 9645-9984          | 0                      | ATG/T(AA)        | 9645-9984           | 0                      | ATG/T(AA)        |
| trnR(tcg)      | +      | 9985-10054         | 0                      |                  | 9985-10054          | 0                      |                  |
| ND4L           | +      | 10055-10339        | 0                      | GTG/TAA          | 10055-10339         | 0                      | GTG/TAA          |
| ND4            | +      | 10333-11692        | -7                     | ATG/T(AA)        | 10333-11692         | -7                     | ATG/T(AA)        |
| trnH(gtg)      | +      | 11693-11760        | 0                      |                  | 11693-11760         | 0                      |                  |
| trnS(gct)      | +      | 11761-11827        | 0                      |                  | 11761-11827         | 0                      |                  |
| ND5            | +      | 11860-13647        | 32                     | ATG/AGA          | 11849-13645         | 21                     | ATG/AGA          |
| ND6            | -      | 14084-14578        | 436                    | ATG/AGA          | 14316-14810         | 670                    | ATG/AGG          |
| trnE(ttc)      | -      | 14579-14647        | 0                      |                  | 14811-14879         | 0                      |                  |
| CYTB           | +      | 14651-15793        | 3                      | ATG/TAA          | 14883-16025         | 3                      | ATG/TAA          |
| Control region | +      | 15794-19395        | 0                      |                  | 16026-17833         | 0                      |                  |

**Table S3.** RSCU information for the mitochondrial protein-coding genes of *R. hanluica* and *R. longicrus*.

| Codon  | <i>R. hanluica</i> |      | <i>R. longicrus</i> |      | Codon  | <i>R. hanluica</i> |      | <i>R. longicrus</i> |      | Codon  | <i>R. hanluica</i> |      | <i>R. longicrus</i> |      | Codon  | <i>R. hanluica</i> |      | <i>R. longicrus</i> |      |
|--------|--------------------|------|---------------------|------|--------|--------------------|------|---------------------|------|--------|--------------------|------|---------------------|------|--------|--------------------|------|---------------------|------|
|        | Count              | RSCU | Count               | RSCU |        | Count              | RSCU | Count               | RSCU |        | Count              | RSCU | Count               | RSCU |        | Count              | RSCU | Count               | RSCU |
| UUU(F) | 119                | 0.91 | 121                 | 0.94 | UCU(S) | 61                 | 1.36 | 63                  | 1.39 | UAU(Y) | 52                 | 0.9  | 52                  | 0.89 | UGU(C) | 8                  | 0.53 | 10                  | 0.65 |
| UUC(F) | 142                | 1.09 | 137                 | 1.06 | UCC(S) | 81                 | 1.81 | 78                  | 1.73 | UAC(Y) | 64                 | 1.1  | 65                  | 1.11 | UGC(C) | 22                 | 1.47 | 21                  | 1.35 |
| UUA(L) | 106                | 1    | 112                 | 1.07 | UCA(S) | 62                 | 1.38 | 67                  | 1.48 | UAA(*) | 3                  | 1.71 | 3                   | 1.71 | UGA(W) | 79                 | 1.46 | 87                  | 1.61 |
| UUG(L) | 39                 | 0.37 | 29                  | 0.28 | UCG(S) | 10                 | 0.22 | 7                   | 0.15 | UAG(*) | 1                  | 0.57 | 1                   | 0.57 | UGG(W) | 29                 | 0.54 | 21                  | 0.39 |
| CUU(L) | 112                | 1.06 | 110                 | 1.05 | CCU(P) | 45                 | 0.88 | 43                  | 0.83 | CAU(H) | 23                 | 0.44 | 24                  | 0.45 | CGU(R) | 10                 | 0.54 | 8                   | 0.44 |
| CUC(L) | 183                | 1.73 | 175                 | 1.67 | CCC(P) | 95                 | 1.86 | 101                 | 1.96 | CAC(H) | 81                 | 1.56 | 83                  | 1.55 | CGC(R) | 23                 | 1.24 | 24                  | 1.32 |
| CUA(L) | 144                | 1.36 | 146                 | 1.39 | CCA(P) | 51                 | 1    | 52                  | 1.01 | CAA(Q) | 67                 | 1.63 | 68                  | 1.68 | CGA(R) | 34                 | 1.84 | 36                  | 1.97 |
| CUG(L) | 50                 | 0.47 | 58                  | 0.55 | CCG(P) | 13                 | 0.25 | 10                  | 0.19 | CAG(Q) | 15                 | 0.37 | 13                  | 0.32 | CGG(R) | 7                  | 0.38 | 5                   | 0.27 |
| AUU(I) | 123                | 0.84 | 130                 | 0.9  | ACU(T) | 63                 | 0.88 | 64                  | 0.87 | AAU(N) | 51                 | 0.77 | 54                  | 0.83 | AGU(S) | 19                 | 0.42 | 16                  | 0.35 |
| AUC(I) | 171                | 1.16 | 160                 | 1.1  | ACC(T) | 112                | 1.57 | 110                 | 1.49 | AAC(N) | 81                 | 1.23 | 76                  | 1.17 | AGC(S) | 36                 | 0.8  | 40                  | 0.89 |
| AUA(M) | 106                | 1.35 | 110                 | 1.37 | ACA(T) | 95                 | 1.33 | 105                 | 1.42 | AAA(K) | 72                 | 1.73 | 70                  | 1.71 | AGA(*) | 2                  | 1.14 | 1                   | 0.57 |
| AUG(M) | 51                 | 0.65 | 51                  | 0.63 | ACG(T) | 16                 | 0.22 | 16                  | 0.22 | AAG(K) | 11                 | 0.27 | 12                  | 0.29 | AGG(*) | 1                  | 0.57 | 2                   | 1.14 |
| GUU(V) | 51                 | 1.02 | 50                  | 1    | GCU(A) | 95                 | 1.14 | 87                  | 1.05 | GAU(D) | 20                 | 0.56 | 24                  | 0.68 | GGU(G) | 28                 | 0.5  | 24                  | 0.42 |
| GUC(V) | 60                 | 1.2  | 63                  | 1.26 | GCC(A) | 154                | 1.84 | 157                 | 1.9  | GAC(D) | 52                 | 1.44 | 47                  | 1.32 | GGC(G) | 86                 | 1.53 | 90                  | 1.59 |
| GUA(V) | 62                 | 1.24 | 52                  | 1.04 | GCA(A) | 71                 | 0.85 | 71                  | 0.86 | GAA(E) | 64                 | 1.51 | 63                  | 1.47 | GGA(G) | 64                 | 1.14 | 59                  | 1.04 |
| GUG(V) | 27                 | 0.54 | 35                  | 0.7  | GCG(A) | 14                 | 0.17 | 15                  | 0.18 | GAG(E) | 21                 | 0.49 | 23                  | 0.53 | GGG(G) | 47                 | 0.84 | 53                  | 0.94 |
